# Supplementary material for: Transplantation of CRISPRa system engineered IL10-overexpressing bone marrow-derived mesenchymal stem cells for the treatment of myocardial infarction in diabetic mice
Source: PubMed Central journal article supplement (PMC6543626; doi:10.1186/s13036-019-0163-6), 2019-05-30
Supplement: 13036_2019_163_MOESM1_ESM.pdf [file 13036_2019_163_MOESM1_ESM.pdf]

## Supplementary materials

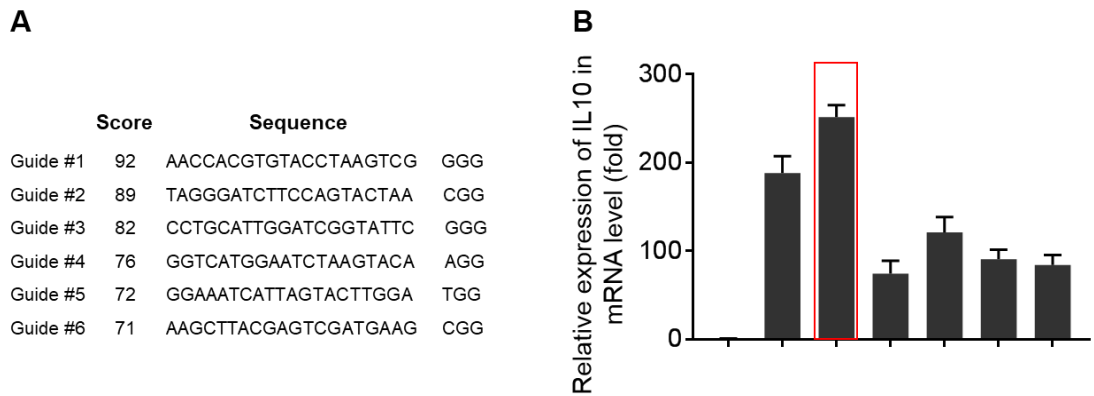

Figure S1. (A) gRNAs (gIL10) were designed using the CRISPR.mit.edu platform, and 6 candidate gRNA sequence were selected according to the scores. (B) Activation of IL10 expression after transfected with different pCas9/gIL10. The activation of IL10 were examined by real-time PCR. The Guide#2 was selected for the further experiments.

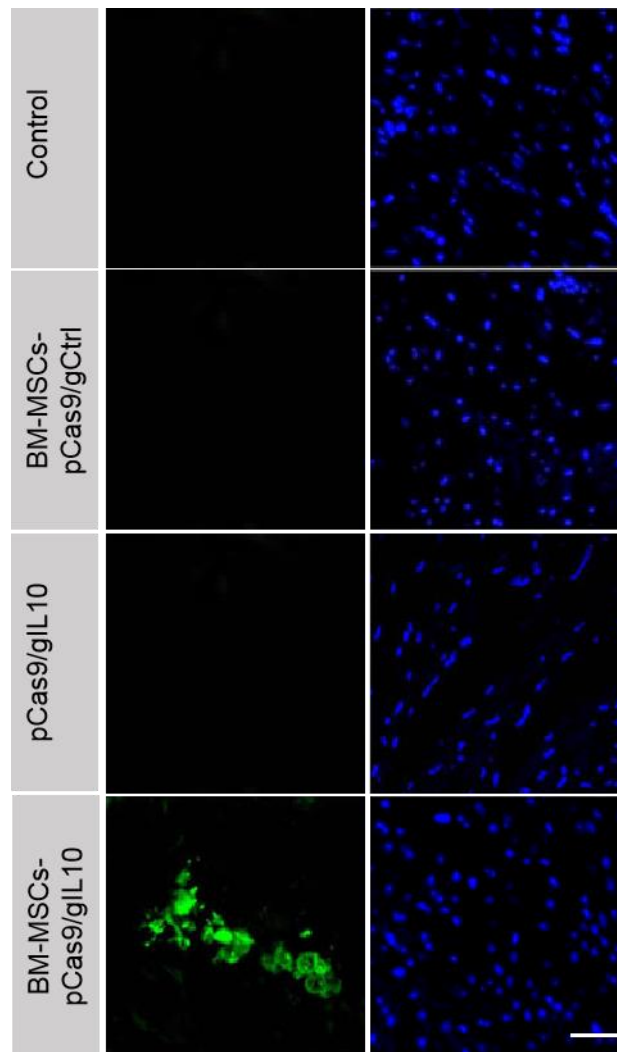

Figure S2. Representative confocal laser microscopic images of engrafted BM-MSCs at 4 weeks after transplantation. GFP positive cells indicated the alive BM-MSCs.

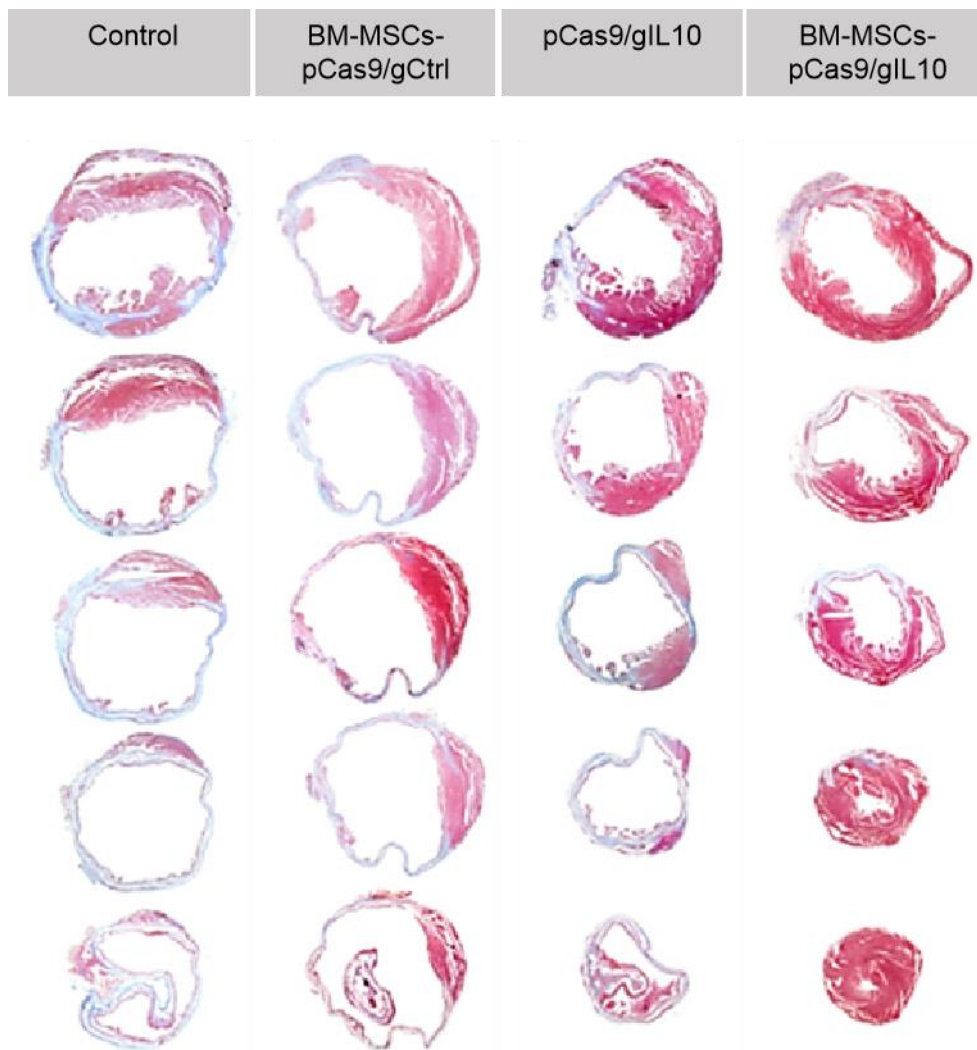

Figure S3. The five sections of the representative Masson's trichrome - stained myocardial sections in the control MI heart or hearts treated with BM-MSCs pCas9/gCtrl, pCas9/gIL10 or BM-MSCs pCas9/gIL10. Blue, scar tissue; red, viable myocardium.
